# Supplementary material
Source: publisher site journal article supplement (https://www.dovepress.com/article/381812)
Supplement: Supplementary file 1 [file get_supplementary_file.php]

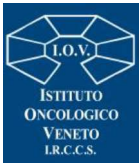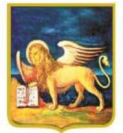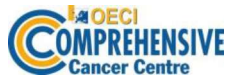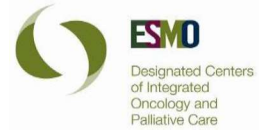

Please write only the initial letter of your name and surname: \_\_\_\_\_

Date of birth (g, m, a): \_\_\_\_\_

Date of today (g, m, a): \_\_\_\_\_

### Questionnaire on the Paternity for Patients with Testicular Cancer

With this questionnaire we would like to know some things about you, to understand if you have children or what you think about the possibility of having them. Please answer all questions by placing a cross in the box that best matches your answer. There is no "right" or "wrong" answer and if you don't know the answer or if you prefer not to answer, you are free to do so by ticking the appropriate box.

| <b>A - Family and work status</b>                                                                                                                                                                                         | <b>YES</b>               | <b>NO</b>                | <b>I don't answer</b>    |
|---------------------------------------------------------------------------------------------------------------------------------------------------------------------------------------------------------------------------|--------------------------|--------------------------|--------------------------|
| 1 - Do you currently have a stable job?                                                                                                                                                                                   | <input type="checkbox"/> | <input type="checkbox"/> | <input type="checkbox"/> |
| 2 - Who do you currently live with?<br><input type="checkbox"/> Alone<br><input type="checkbox"/> With my partner<br><input type="checkbox"/> With my parents<br><input type="checkbox"/> With some friends / girlfriends |                          |                          |                          |

| <b>B - About your testicular cancer.</b>                              | <b>YES</b>               | <b>NO</b>                | <b>I don't answer</b>    |
|-----------------------------------------------------------------------|--------------------------|--------------------------|--------------------------|
| 3 - At what age was the testicle removed? _____                       |                          |                          |                          |
| 4 - Have you received chemotherapy?<br>If YES, how many cycles? _____ | <input type="checkbox"/> | <input type="checkbox"/> | <input type="checkbox"/> |
| 5 - Have you undergone retroperitoneal lymphadenectomy?               | <input type="checkbox"/> | <input type="checkbox"/> | <input type="checkbox"/> |
| 6 - Have you been subjected to radiotherapy?                          | <input type="checkbox"/> | <input type="checkbox"/> | <input type="checkbox"/> |
| 7 - Did you perform the cryopreservation of the semen?                | <input type="checkbox"/> | <input type="checkbox"/> | <input type="checkbox"/> |
| Was the procedure successful?                                         | <input type="checkbox"/> | <input type="checkbox"/> | <input type="checkbox"/> |
| If you did NOT perform it, was it proposed to you?                    | <input type="checkbox"/> | <input type="checkbox"/> | <input type="checkbox"/> |
| If YES, did you refuse it?<br>Why? _____                              | <input type="checkbox"/> | <input type="checkbox"/> | <input type="checkbox"/> |

| <b>C - Before the diagnosis of testicular cancer</b>                                                        | <b>YES</b>               | <b>NO</b>                | <b>I don't answer</b>    |
|-------------------------------------------------------------------------------------------------------------|--------------------------|--------------------------|--------------------------|
| 8 - Have you had any other testicular surgeries or a history of cryptorchidism?<br>If yes, what kind? _____ | <input type="checkbox"/> | <input type="checkbox"/> | <input type="checkbox"/> |
| 9 - Have you ever had problems with sexual desire?                                                          | <input type="checkbox"/> | <input type="checkbox"/> | <input type="checkbox"/> |
| 10 - Have you ever had difficulties with erection or ejaculation?                                           | <input type="checkbox"/> | <input type="checkbox"/> | <input type="checkbox"/> |
| 11 - Have you ever had fertility problems?                                                                  | <input type="checkbox"/> | <input type="checkbox"/> | <input type="checkbox"/> |



**Regione del Veneto**  
**Istituto Oncologico Veneto**  
 Istituto di Ricovero e Cura a Carattere Scientifico



REGIONE DEL VENETO



Dipartimento di Oncologia Clinica e Sperimentale  
**Unità Operativa Complessa Oncologia Medica 1**  
 Direttore dott.ssa Vittorina Zagonel

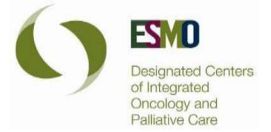

| <b>D - Family situation and paternity after diagnosis of testicular cancer</b>                                                                                                                                                                                                                                                                                                                                                                                                                                    | <b>YES</b>               | <b>NO</b>                | <b>I don't answer</b>    |
|-------------------------------------------------------------------------------------------------------------------------------------------------------------------------------------------------------------------------------------------------------------------------------------------------------------------------------------------------------------------------------------------------------------------------------------------------------------------------------------------------------------------|--------------------------|--------------------------|--------------------------|
| 12 - Did you have children before being diagnosed with testicular cancer?<br>If YES, how many? _____                                                                                                                                                                                                                                                                                                                                                                                                              | <input type="checkbox"/> | <input type="checkbox"/> | <input type="checkbox"/> |
| 13 - Do you think you have fertility problems?                                                                                                                                                                                                                                                                                                                                                                                                                                                                    | <input type="checkbox"/> | <input type="checkbox"/> | <input type="checkbox"/> |
| 14 - Did you perform a semen examination after diagnosis and treatment?<br>If YES, were sperm present?                                                                                                                                                                                                                                                                                                                                                                                                            | <input type="checkbox"/> | <input type="checkbox"/> | <input type="checkbox"/> |
| 15 - Did you have children before being diagnosed with testicular cancer?<br>If YES, how many? _____                                                                                                                                                                                                                                                                                                                                                                                                              |                          |                          |                          |
| 16 - After diagnosis and treatment, did you have or do you have a stable partner?                                                                                                                                                                                                                                                                                                                                                                                                                                 | <input type="checkbox"/> | <input type="checkbox"/> | <input type="checkbox"/> |
| 17 - Did you have children after diagnosis and treatment?                                                                                                                                                                                                                                                                                                                                                                                                                                                         | <input type="checkbox"/> | <input type="checkbox"/> | <input type="checkbox"/> |
| 18 - If you did not have children after the surgery, what is the reason?<br><input type="checkbox"/> I have not had / do not have a partner<br><input type="checkbox"/> I'm not ready to have them yet<br><input type="checkbox"/> I don't have the financial means to get them<br><input type="checkbox"/> My partner doesn't want them or she can't have them<br><input type="checkbox"/> I have tried unsuccessfully for... years<br><input type="checkbox"/> I don't want to resort to assisted fertilization |                          |                          |                          |
| 19 - If you have had children after diagnosis and treatment, write how many and in what year _____                                                                                                                                                                                                                                                                                                                                                                                                                | <input type="checkbox"/> | <input type="checkbox"/> | <input type="checkbox"/> |
| 20-did you have them naturally?                                                                                                                                                                                                                                                                                                                                                                                                                                                                                   | <input type="checkbox"/> | <input type="checkbox"/> | <input type="checkbox"/> |
| 21 - Have you made use of assisted fertilization?                                                                                                                                                                                                                                                                                                                                                                                                                                                                 | <input type="checkbox"/> | <input type="checkbox"/> | <input type="checkbox"/> |
| 22 - Did you use cryopreserved semen?                                                                                                                                                                                                                                                                                                                                                                                                                                                                             | <input type="checkbox"/> | <input type="checkbox"/> | <input type="checkbox"/> |
| 23 - How many assisted fertilization attempts have you made? _____                                                                                                                                                                                                                                                                                                                                                                                                                                                |                          |                          |                          |
| 24 - Did you resort to adoption?                                                                                                                                                                                                                                                                                                                                                                                                                                                                                  | <input type="checkbox"/> | <input type="checkbox"/> | <input type="checkbox"/> |

I.O.V. I.R.C.C.S. Ospedale Busonera, Via Gattamelata 64 - 35128 Padova  
 C.F./P.I. 04074560287

ISTITUTO CON SISTEMA DI GESTIONE QUALITA' UNI-ISO 9001:2008  
 CERTIFICATO DA CERTIQUALITY
